# Supplementary material
Source: PubMed Central journal article supplement (PMC6221884)
Supplement: 41437_2018_60_MOESM7_ESM.pdf [file 41437_2018_60_MOESM7_ESM.pdf]

Supplementary Figure S1.A. Amino acid alignment of *vic2a*

```

CnYM2      1  MGLFSKKKK---DTDVNPYAQAD-----TAPAPAVSNT
CnES19    1  MGLFSKKKK---DADVNPYAQAD-----TAPAPAVSNT
CnIF3     1  MGLFSKKKK---DADVNPYAQAD-----TAPAPAVSNT
CnIF6     1  MGLFSKKKK---DADVNPYAQAD-----TAPAPAVSNT
CpEP146   1  MGLFSKKKK---DAEANNPYAQAG-----TAPAPAVSNT
CpBRU17   1  MGLFSKKKK---DAEANNPYAQAG-----TAPAPAVSNT
Cp09503   1  MGLFSKKKK---DAEANNPYAQAG-----TAPAPAVSNT
CpJA78    1  MGLFSKKKK---DAEANNPYAQAG-----TAPAPAVSNT
CpYS522   1  MGLFSKKKK---DAEANNPYAQAG-----TAPAPAVSNT
CrM2269   1  MGFFSKKKKDADADANPYAQAG-----TAPAPAVSNT
CrM270    1  MGFFSKKKKDADADANPYAQAG-----TAPAPAVSNT
CnOB1_6   1  MGLFSKKKK---DADVNPYSQAD-----TAPAPAVSNT
CnYM5     1  MGLFSKKKK---DADVNPYSQAD-----TAPAPAVSNT
CpDU74    1  MGFFSKKKK---DGNANPYAQDGAQVPFSNPLTPYQQARNDLAQGRPAGLSSSTAPTASNT
Cp09515   1  MGFFSKKKK---DGNANPYAQDGAQVPFSNPLTPYQQARNDLAQGRPAGLSSSTAPTASNT
CpEP155   1  MGFFSKKKK---DGNANPYAQDGAQVPFSNPLTPYQQARNDLAQGRPAGLSSSTAPTASNT
CpR112    1  MGFFSKKKK---DGNANPYAQDGAQVPFSNPLTPYQQARNDLAQGRPAGLSSSTAPTASNT
CpJA69    1  MGFFSKKKK---DGNANPYAQDGAQVPFSNPLTPYQQARNDLAQGRPAGLSSSTAPTASNT
Cr09491   1  MGFFSKKKK---DANANPYAQDGAQVPFSNPLTPYQQARNDMAQGRPVGLSTGTAPAASNT
CrGM8A    1  MGFFSKKKK---DANANPYAQDGAQVPFSNPLTPYQQARNDMAQGRPVGLSTGTAPAASNT

```

```

CnYM2      31  PPPPYHNPSIASSGYSDAKYGAQNGYGADRY---GQGSAPAGYGGFNS-AGNNRSOASPA
CnES19    31  PPPSYHAPSSIASSGYGDAKYGAQNGYGADRY---GQGPAPGGYGGFSS-AGNNRGQVSTA
CnIF3     31  PPPSYHAPSSIASSGYGDAKYGAQNGYGADRY---GQGPAPGGYGGFSS-AGNNRGQVSTA
CnIF6     31  PPPSYHAPSSIASSGYGDAKYGAQNGYGADRY---GQGPAPGGYGGFSS-AGKNRGQVSTA
CpEP146   31  PPPSYHSPSIASSRYGDEKLGTQNGYGADRY---GSGPAPGGYGGFNP-AGNNRSOASTA
CpBRU17   31  PPPSYHSPSIASSRYGDEKLGTQNGYGADRY---GSGPAPGGYGGFNP-AGNNRSOASTA
Cp09503   31  PPPSYHSPSIASSRYGDEKLGTQNGYGADRY---GSGPAPGGYGGFNP-AGNNRSOASTA
CpJA78    31  PPPSYHSPSIASSRYGDEKLGTQNGYGADRY---GSGPAPGGYGGFNP-AGNNRSOASTA
CpYS522   31  PPPSYHSPSIASSRYGDEKLGTQNGYGADRY---GSGPAPGGYGGFNP-AGNNRSOASTA
CrM2269   33  PPPSYHSPSIASSRYGDEKYGTQNGYGAGRY---GLGPAPGGYGSFNP-AGNNRSOASTA
CrM270    33  PPPSYHSPSIASSRYGDEKYGTQNGYGAGRY---GLGPAPGGYGSFNP-AGNNRSOASTA
CnOB1_6   31  PPPSYHAPSSIASSRYGDEKYGAQSGYGADRY---GQGPAPAGYGGFSS-AGNNRSOASTA
CnYM5     31  PPPSYHAPSSIASSRYGDEKYGAQSGYGADRY---GQGPAPAGYGGFSS-AGNNRSOASTA
CpDU74    59  PPPSYHSPSIASSRYGDEKYGNQKGYGTDRYGSTGSGPAPGGYGGFNSDAGNNRSOASAA
Cp09515   59  PPPSYHSPSIASSRYGDEKYGNQKGYGTDRYGSTGSGPAPGGYGGFNSDAGNNRSOASAA
CpEP155   59  PPPSYHSPSIASSRYGDEKYGNQKGYGTDRYGSTGSGPAPGGYGGFNSDAGNNRSOASAA
CpR112    59  PPPSYHSPSIASSRYGDEKYGNQKGYGTDRYGSTGSGPAPGGYGGFNSDAGNNRSOASAA
CpJA69    59  PPPSYHSPSIASSRYGDEKYGNQKGYGTDRYGSTGSGPAPGGYGGFNSDAGNNRSOASAA
Cr09491   59  PPPSYHSPSIASSRYGDEKYGNQKGYGADRYGNTGSSPAPGGYGGFSS-AGNNRSOASTA
CrGM8A    59  PPPSYHSPSIASSRYGDEKYGNQKGYGADRYGNTGSSPAPGGYGGFSS-AGNNRSOASTA

```

```

CnYM2      87  TPAGGGGNPALFGNAEARYNPYGGSKPQAQSGPEGDEYGGYGAPRELTEEERAEAETQAI
CnES19    87  TPAGGNGNAALFGNAEARYNPYGGSKPQAQSGPEGDEYGGYGAPRELTEEEQAEAETQAI
CnIF3     87  TPAGGNGNAALFGNAEARYNPYGGSKPQAQSGPEGDEYGGYGAPRELTEEEQAEAETQAI
CnIF6     87  TPAGGNGNAALFGNAEARYNPYGGSKPQAQSGPEGDEYGGYGAPRELTEEERAEAETQAV
CpEP146   87  TPAAGDGNPALFGNAKDRYNPYGGSKPQAQSGPEGDEYGGYGAPRELTEEEQAEADTQAL
CpBRU17   87  TPAAGDGNPALFGNAKDRYNPYGGSKPQAQSGPEGDEYGGYGAPRELTEEEQAEADTQAL
Cp09503   87  TPAAGDGNPALFGNAKDRYNPYGGSKPQAQSGPEGDEYGGYGAPRELTEEEQAEADTQAL
CpJA78    87  TPAAGDGNPALFGNAKDRYNPYGGSKPQAQSGPEGDEYGGYGAPRELTEEEQAEADTQAL
CpYS522   87  TPAAGDGNPALFGNAKDRYNPYGGSKPQAQSGPEGDEYGGYGAPRELTEEEQAEADTQAL
CrM2269   89  PPAGGDRNPALFGNAQERYNPYGGSKPLAQSGPEGDEYGGYGAPRELTEEEKAEAETQAY
CrM270    89  PPAGGDRNPALFGNAQERYNPYGGSKPLAQSGPEGDEYGGYGAPRELTEEEKAEAETQAY
CnOB1_6   87  PPTGAGGNALFGNAQDRYNPYGGSTPQAQSGTQDEYGGYGAPRELTEE---EAKTQAL
CnYM5     87  PPTGAGGNALFGNAQDRYNPYGGSTPQAQSGTQDEYGGYGAPRELTEE---EAKTQAL
CpDU74    119  QPAGGDRNPALFGNAQERYNPYGGSKPQAQSGPQDEYGGYGAQRELTEEEQAEAQAH
Cp09515   119  QPAGGDRNPALFGNAQERYNPYGGSKPQAQSGPQDEYGGYGAQRELTEEEQAEAQAH
CpEP155   119  QPAGGDRNPALFGNAQERYNPYGGSKPQAQSGPQDEYGGYGAQRELTEEEQAEAQAH
CpR112    119  QPAGGDRNPALFGNAQERYNPYGGSKPQAQSGPQDEYGGYGAQRELTEEEQAEAQAH
CpJA69    119  QPAGGDRNPALFGNAQERYNPYGGSKPQAQSGPQDEYGGYGAQRELTEEEQAEAQAH
Cr09491   118  PPAGGDRNPALFGNAQERYNPYGGSKPQAQSGPEGDYGGYGAPRELTEEEKAEAQTQAY
CrGM8A    118  PPAGGDRNPALFGNAQERYNPYGGSKPQAQSGPEGDYGGYGAPRELTEEEKAEAQTQAY

```

CnYM2 147 VNETNAVRGESNASINRSIGGLEEQGLAVLQASRMRVAQODSRIINAENKLDOSLMHAKDG  
CnES19 147 VDKTNAVRDESNASINRSINGLEESGLAQIQASRMRVAQODSRLINADKNLNOSLIHARDG  
CnIF3 147 VDKTNAVRDESNASINRSINGLEESGLAQIQASRMRVAQODSRLINADKNLNOSLIHARDG  
CnIF6 147 VDETNAVRDESNASLNRTIGGLEHSGVIGKSSRMKIAQODSMLINTDKNLNOSLVHARDG  
CpEP146 147 VDQTNAVRDESWASTORTIGGIEGGLAQVQASRMRVAQODSRLNNAERNLDOSSLSHARDG  
CpBRU17 147 VDQTNAVRDESWASTORTIGGIEGGLAQVQASRMRVAQODSRLNNAERNLDOSSLSHARDG  
Cp09503 147 VDQTNAVRDESWASTORTIGGIEGGLAQVQASRMRVAQODSRLNNAERNLDOSSLSHARDG  
CpJA78 147 VDQTNAVRDESWASTORTIGGIEGGLAQVQASRMRVAQODSRLNNAERNLDOSSLSHARDG  
CpYS522 147 VDQTNAVRDESWASTORTIGGIEGGLAQVQASRMRVAQODSRLNNAERNLDOSSLSHARDG  
CrM2269 149 VDQTNAVRDESASVORTAAGLESGLAQLOSSRMRVAEQDSRLNNAERNLDOSSLSHARDG  
CrM270 149 VDQTNAVRDESASVORTAAGLESGLAQLOSSRMRVAEQDSRLNNAERNLDOSSLSHARDG  
CnOB1\_6 144 KDEANGLRDEGIASLORTLAMGNQAFEQVTGTMVRIDQODEMMFNANKNLDSSLAHARDG  
CnYM5 144 KDEANGLRDEGIASLORTLAMGNQAFEQVTGTMVRIDQODEMMFNANKNLDSSLAHARDG  
CpDU74 179 VDEAHGVRNESIAALORTLAMGNQAFEQATGTLVRIDQODEMMFNANKNLDSSLAHARDG  
Cp09515 179 VDEAHGVRNESIAALORTLAMGNQAFEQATGTLVRIDQODEMMFNANKNLDSSLAHARDG  
CpEP155 179 VDEAHGVRNESIAALORTLAMGNQAFEQATGTLVRIDQODEMMFNANKNLDSSLAHARDG  
CpR112 179 VDEAHGVRNESIAALORTLAMGNQAFEQATGTLVRIDQODEMMFNANKNLDSSLAHARDG  
CpJA69 179 VDEAHGVRNESIAALORTLAMGNQAFEQAIGTLVRIDQODEMMFNANKNLDSSLAHARDG  
Cr09491 178 VDEANGVRDESIAALORTLAMGNQALDQACGTTLVRIDQODEMMFNANKNLDSSLAHARDG  
CrGM8A 178 VDEANGVRDESIAALORTLAMGNQALDQACGTTLVRVDQODEMMFNANKNLDSSLAHARDG

CnYM2 207 AOKTKTLHTLNKKPPFFVPVGGTSSKAVOREVDRDTEENYRS DRAKKEDTROADWANRQRTR  
CnES19 207 AOKTKTLDKLNRTPFILPVGGSSSKAVERDVAOKTQEYQSDKAKQEDTROEDWRLRQRTR  
CnIF3 207 AOKTKTLDKLNRTPFILPVGGSSSKAVERDVAOKTQEYQSDKAKQEDTROEDWRLRQRTR  
CnIF6 207 AOKTKTLDTLNRKPPFFMPVGGTSVKAVEROVAOKTQDYQSDKATQENTROANWKLQRTR  
CpEP146 207 AOKTKTLDTLNRKPPFFMPVGGTSVKAVEROVAQETEEHSGDKAKAEVTROARWEIEKRLK  
CpBRU17 207 AOKTKTLDTLNRKPPFFMPVGGTSVKAVEROVAQETEEHSGDKAKAEVTROARWEIEKRLK  
Cp09503 207 AOKTKTLDTLNRKPPFFMPVGGTSVKAVEROVAQETEEHSGDKAKAEVTROARWEIEKRLK  
CpJA78 207 AOKTKTLDTLNRKPPFFMPVGGTSVKAVEROVAQETEEHSGDKAKAEVTROARWEIEKRLK  
CpYS522 207 AOKTKTLDTLNRKPPFFMPVGGTSVKAVEROVAQETEEHSGDKAKAEVTROARWEIEKRLK  
CrM2269 209 AOKTKTLDTLNRKPPFFMPVGGTSARAVERKADDLKEYRGGDKSVKEGTRETAWKTQORLR  
CrM270 209 AOKTKTLDTLNRKPPFFMPVGGTSARAVERKADDLKEYRGGDKSVKEGTRETAWKTQORLR  
CnOB1\_6 204 QAKTKTLQKYNNTAFFIPV-EPGKKAQAKLRELAVMNGAQDREQRGQTOHARYTDQQOTE  
CnYM5 204 QAKTKTLQKYNNTAFFIPV-EPGKKAQAKLRELAVMNGAQDREQRGQTOHARYTDQQOTE  
CpDU74 239 QAKTKTLRKLNDTPFFIPV-EPGRKAQDKLAEMAVLNNRQDREQREOTLQAGYTDROKME  
Cp09515 239 QAKTKTLRKLNDTPFFIPV-EPGRKAQDKLAEMAVLNNRQDREQREOTLQAGYTDROKME  
CpEP155 239 QAKTKTLRKLNDTPFFIPV-EPGRKAQDKLAEMAVLNNRQDREQREOTLQAGYTDROKME  
CpR112 239 QAKTKTLRKLNDTPFFIPV-EPGRKAQDKLAEMAVLNNRQDREQREOTLQAGYTDROKME  
CpJA69 239 QAKTKTLRKLNDTPFFIPV-EPGRKAQDKLAEMAVLNNRQDREQREOTLQAGYTDROKME  
Cr09491 238 QSKTKTLRKLNDTPFFIPV-EPGKKAQDKLAEMAVMNNRQDREQREOTLRAGYTDROKME  
CrGM8A 238 QSKTKTLRKLNDTPFFIPV-EPGKKAQDKLAEMAVMNNRQDREQREOTLRAGYTDROKME

CnYM2 267 EIEKS---GPSAPGLLGSKKPVNSKWVFEDEEGAAMEEDIQAGIEDKLGFLSGELNQOAS  
CnES19 267 EIEKS---GPSAPGLLGSKKPVNSKWVFEDEEGAAKEEIQAGIEKLGFLSGELNEQOAS  
CnIF3 267 EIEKS---GPSAPGLLGSKKPVNSKWVFEDEEGAAKEEIQAGIEKLGFLSGELNEQOAS  
CnIF6 267 EIEKS---NOSSPGLLGSKKPVNSKWVFEDEEGAAKEEIQAGIQKLGFLSGELNEQOAS  
CpEP146 267 AAEN---GPTAPGLLGSKKPVNSKWVFEDEEGAAKEENIQAGIETLGYLSGQLNSQAS  
CpBRU17 267 AAEN---GPTAPGLLGSKKPVNSKWVFEDEEGAAKEENIQAGIETLGYLSGQLNSQAS  
Cp09503 267 AAEN---GPTAPGLLGSKKPVNSKWVFEDEEGAAKEENIQAGIETLGYLSGQLNSQAS  
CpJA78 267 AAEN---GPTAPGLLGSKKPVNSKWVFEDEEGAAKEENIQAGIETLGYLSGQLNSQAS  
CpYS522 267 AAEN---GPTAPGLLGSKKPVNSKWVFEDEEGAAKEENIQAGIETLGYLSGQLNSQAS  
CrM2269 269 ETGKS---GPSAPGLLASKKPVNSKWVFEDEEGAAKEEIQAGIETLGYLSTELNHQAT  
CrM270 269 ETGKS---GPSAPGLLASKKPVNSKWVFEDEEGAAKEEIQAGIETLGYLSTELNHQAT  
CnOB1\_6 263 QDMQQLTRGSPGPRLLAAGRGAS-KFALEDDEEGQAKEENIGNLLVDVLGVSSOKLNEASK  
CnYM5 263 QDMQQLTRGSPGPRLLAAGRGAS-KFALEDDEEGQAKEENIGNLLVDVLGVSSOKLNEASK  
CpDU74 298 QDMQQLARASSGPRLLGAGKPAN-KFALEDDEEGQAQEEQIGGLMDDVLVVSOKLNMAS  
Cp09515 298 QDMQQLARASSGPRLLGAGKPAN-KFALEDDEEGQAQEEQIGGLMDDVLVVSOKLNMAS  
CpEP155 298 QDMQQLARASSGPRLLGAGKPAN-KFALEDDEEGQAQEEQIGGLMDDVLVVSOKLNMAS  
CpR112 298 QDMQQLARASSGPRLLGAGKPAN-KFALEDDEEGQAQEEQIGGLMDDVLVVSOKLNMAS  
CpJA69 298 QDMQQLARASSGPRLLGAGKPAN-KFALEDDEEGQAQEEQIGGLMDDVLVVSOKLNMAS  
Cr09491 297 QDMQQLSRGPSGPRLLGAGKPAN-KFALEDDEEGQAKEEIQIGGMMDDVLVVSOKLNMASN  
CrGM8A 297 QDMQQLSRGPSGPRLLGAGKPAN-KFALEDDEEGQAKEEIQIGGMMDDVLVVSOKLNMASN

|         |     |                  |               |               |                          |
|---------|-----|------------------|---------------|---------------|--------------------------|
| CnYM2   | 324 | AFGDEIQESNNGINRV | VRDKVWSPFPHRL | LLINLLTFDAGX  | -----                    |
| CnES19  | 324 | GLGDEIQQSNKMINGI | EDKVWSPFRHRL  | LKINLLTFDAGX  | -----                    |
| CnIF3   | 324 | GLGDEIQQSNKMINGI | EDKVWSPFRHRL  | LKINLLTFDAGX  | -----                    |
| CnIF6   | 324 | GLGDDIORSNKMINGI | EDKVWSPFRHRL  | QINLLTFDAGX   | -----                    |
| CpEP146 | 324 | ALGDDLQOSIKVINRV | VVDKVWSPFPRWL | QTNLLTFDAGX   | -----                    |
| CpBRU17 | 324 | ALGDDLQOSIKVINRV | VVDKVWSPFPRWL | QTNLLTFDAGX   | -----                    |
| Cp09503 | 324 | ALGDDLQOSIKVINRV | VVDKVWSPFPRWL | QTNLLTFDAGX   | -----                    |
| CpJA78  | 324 | ALGDDLQOSIKVINRV | VVDKVWSPFPRWL | QTNLLTFDAGX   | -----                    |
| CpYS522 | 324 | ALGDDLQOSIKVINRV | VVDKVWSPFPRWL | QTNLLTFDAGX   | -----                    |
| CrM2269 | 326 | ALGGDLQESIKVINRV | VVDKVWVSLFVHR | QOMNLLTFDAGX  | -----                    |
| CrM270  | 326 | ALGGDLQESIKVINRV | VVDKVWVSLFVHR | QOMNLLTFDAGX  | -----                    |
| CnOB1_6 | 322 | ATTSKLQRSNAQIDA  | VHGKVC        | SHFCTLQSHSLTF | GVGRFGGRQGSALNPYLEVPIWSX |
| CnYM5   | 322 | ATTSKLQRSNAQIDA  | VHGKVC        | SHFCTLQSHSLTF | GVGRFGGRQGSALNPYLEVPIWSX |
| CpDU74  | 357 | AMTGKLEERSIAQIND | VSGKVC        | SPFRTLQSRSLT  | SGAGX-----               |
| Cp09515 | 357 | AMTGKLEERSIAQIND | VSGKVC        | SPFRTLQSRSLT  | SGAGX-----               |
| CpEP155 | 357 | AMTGKLEERSIAQIND | VSGKVC        | SPFRTLQSRSLT  | SGAGX-----               |
| CpR112  | 357 | AMTGKLEERSIAQIND | VSGKVC        | SPFRTLQSRSLT  | SGAGX-----               |
| CpJA69  | 357 | AMTGKLEERSIAQIND | VSGKVC        | SPFRTLQSRSLT  | SGAGX-----               |
| Cr09491 | 356 | AMTGKLEERSIAQIND | VSGKVC        | SPLVHCYSR     | -----IHX-----            |
| CrGM8A  | 356 | AMTGKLEERSIAQIND | VSGKVC        | SPLVHCYSR     | -----IHX-----            |

Supplementary Figure S1.B. Amino acid alignment of helicase-like gene

|         |   |                       |                                             |
|---------|---|-----------------------|---------------------------------------------|
| CpEP155 | 1 | YGRVLLAAGDPKNDCLLEA   | IDIIACLTAGDDIFYQLRSEEEIEEIQESRKELYRREGDLL   |
| CpDU74  | 1 | YGRVLLAAGDPKNDCLLEA   | IDIIACLTAGDDIFYQLRSEEEIEEIQESRKELYRREGDLL   |
| Cp09515 | 1 | YGRVLLAAGDPKNDCLLEA   | IDIIACLTAGDDIFYQLRSEEEIEEIQESRKELYRREGDLL   |
| CpJA69  | 1 | YGRVLLAAGDPKNDCLLEA   | IDIIACLTAGDDIFYQLRSEEEIEEIQESRKELYRREGDLL   |
| CpR112  | 1 | YGRVLLAAGDPKNDCLLEA   | IDIIACLTAGDDIFYQLRSEEEIEEIQESRKELYRREGDLL   |
| CnIF6   | 1 | YGRVLLAAGD[SK]NDCLLEA | IDIIACLTAGDDIFYQLRSEEEIEEIQ[Q]SRKELYRREGDLL |
| CpEP146 | 1 | YGRVLLAAGDPKNDCLLEV   | IDIIACLTAGDDIFYQLRSEEEIEEIR[ES]RKELYRREGDLL |
| CpBRU17 | 1 | YGRVLLAAGDPKNDCLLEV   | IDIIACLTAGDDIFYQLRSEEEIEEIR[ES]RKELYRREGDLL |
| Cp09503 | 1 | YGRVLLAAGDPKNDCLLEV   | IDIIACLTAGDDIFYQLRSEEEIEEIR[ES]RKELYRREGDLL |
| CpJA78  | 1 | YGRVLLAAGDPKNDCLLEV   | IDIIACLTAGDDIFYQLRSEEEIEEIR[ES]RKELYRREGDLL |
| CpYS522 | 1 | YGRVLLAAGDPKNDCLLEV   | IDIIACLTAGDDIFYQLRSEEEIEEIR[ES]RKELYRREGDLL |
| Cr09491 | 1 | YGRVLLAAGDPKNDCLLEV   | IDIIACLTAGDDIF[H]QLRSEEEIEEIQESRKELYRREGDLL |
| CrM2269 | 1 | YGRVLLAAGDPKNDCLLEV   | IDIIACLTAGDDIF[H]QLRSEEEIEEIQESRKELYRREGDLL |
| CrM270  | 1 | YGRVLLAAGDPKNDCLLEV   | IDIIACLTAGDDIF[H]QLRSEEEIEEIQESRKELYRREGDLL |
| CrGM8A  | 1 | YGRVLLAAGDPKNDCLLEV   | IDIIACLTAGDDIF[H]QLRSEEEIEEIQESRKELYRREGDLL |
| CnYM2   | 1 | YGRVLLAAGDPKNDCLLEA   | IDIIACLTAGDDIFYQLRSEEEIEEIQESRKELYRREGDLL   |
| CnOB1_6 | 1 | YGRVLLAAGDPKNDCLLET   | IDIIACLTAGDDIFYQLRSEEEIEEIQESRKELYRREGDLL   |
| CnYM5   | 1 | YGRVLLAAGDPKNDCLLET   | IDIIACLTAGDDIFYQLRSEEEIEEIQESRKELYRREGDLL   |
| CnES19  | 1 | YGRVLLAAGDPKNDCLLEA   | IDIIACLTAGDDIFYQLRSEEEIEE[V]QESRKELYRREGDLL |
| CnIF3   | 1 | YGRVLLAAGDPKNDCLLEA   | IDIIACLTAGDDIFYQLRSEEEIEE[V]QESRKELYRREGDLL |

|         |    |                |                                                        |
|---------|----|----------------|--------------------------------------------------------|
| CpEP155 | 61 | TYLTTVQQYTAEHS | DRVEWCKRRKVNTRVMKQALNIRKQLRGLCCLKEKMLADAPPQDPQP        |
| CpDU74  | 61 | TYLTTVQQYTAEHS | DRVEWCKRRKVNTRVMKQALNIRKQLRGLCCLKEKMLADAPPQDPQP        |
| Cp09515 | 61 | TYLTTVQQYTAEHS | DRVEWCKRRKVNTRVMKQALNIRKQLRGLCCLKEKMLADAPPQDPQP        |
| CpJA69  | 61 | TYLTTVQQYTAEHS | DRVEWCKRRKVNTRVMKQALNIRKQLRGLCCLKEKMLADAPPQDPQP        |
| CpR112  | 61 | TYLTTVQQYTAEHS | DRVEWCKRRKVNTRVMKQALNIRKQLRGLCCLKEKMLADAPPQDPQP        |
| CnIF6   | 61 | TYLTTVQQYTAEHA | DRVEWCKRRKVN[AV]RVMKQALNIRKQLRGLCCLKEK[L]L[D]DAPPQDPQP |
| CpEP146 | 61 | TYLTTVQQYTAEHS | DRVEWCKRRKVNTRVMKQALNIRKQLRGLCCLKEKMLADAPPQDPQP        |
| CpBRU17 | 61 | TYLTTVQQYTAEHS | DRVEWCKRRKVNTRVMKQALNIRKQLRGLCCLKEKMLADAPPQDPQP        |
| Cp09503 | 61 | TYLTTVQQYTAEHS | DRVEWCKRRKVNTRVMKQALNIRKQLRGLCCLKEKMLADAPPQDPQP        |
| CpJA78  | 61 | TYLTTVQQYTAEHS | DRVEWCKRRKVNTRVMKQALNIRKQLRGLCCLKEKMLADAPPQDPQP        |
| CpYS522 | 61 | TYLTTVQQYTAEHS | DRVEWCKRRKVNTRVMKQALNIRKQLRGLCCLKEKMLADAPPQDPQP        |
| Cr09491 | 61 | TYLTTVQQYTAEHA | DR[TE]WCKRRKVNTRVMKQALNIRKQLRGLCCLKEKMLADAPPQDPQP      |
| CrM2269 | 61 | TYLTTVQQYTAEHA | DRVEWCKRRKVNTRVMKQALNIRKQLRGLCCLKEKMLADAPPQDPQP        |
| CrM270  | 61 | TYLTTVQQYTAEHA | DRVEWCKRRKVNTRVMKQALNIRKQLRGLCCLKEKMLADAPPQDPQP        |
| CrGM8A  | 61 | TYLTTVQQYTAEHA | DRVEWCKRRKVNTRVMKQALNIRKQLRGLCCLKEKMLADAPPQDPQP        |
| CnYM2   | 61 | TYLTTVQQYTAEHA | DRVEWCKRRKVNTRVMKQALNIRKQLRGLCCLKEKML[D]DAPPQDP[K]P    |
| CnOB1_6 | 61 | TYLTTVQQYTAEHA | DRVEWCKRRKVNTRVMKQALNIRKQLRGLCCLKEKML[D]DAPPQDPQP      |
| CnYM5   | 61 | TYLTTVQQYTAEHA | DRVEWCKRRKVNTRVMKQALNIRKQLRGLCCLKEKML[D]DAPPQDPQP      |
| CnES19  | 61 | TYLTTVQQYTAEHA | DRVEWCKRRKVNTRVMKQALNIRKQLRGLCCLKEKML[D]D[V]PPQDPQP    |
| CnIF3   | 61 | TYLTTVQQYTAEHA | DRVEWCKRRKVNTRVMKQALNIRKQLRGLCCLKEKML[D]D[V]PPQDPQP    |

|         |     |               |                         |                              |
|---------|-----|---------------|-------------------------|------------------------------|
| CpEP155 | 121 | FTPTSPERA[E]I | ILKCFLTGFAMKTALLAPDASYM | TTFGKHVVAIHPASVMHGQKREAIM    |
| CpDU74  | 121 | FTPTSPERA[E]I | ILKCFLTGFAMKTALLAPDASYM | TTFGKHVVAIHPASVMHGQKREAIM    |
| Cp09515 | 121 | FTPTSPERA[E]I | ILKCFLTGFAMKTALLAPDASYM | TTFGKHVVAIHPASVMHGQKREAIM    |
| CpJA69  | 121 | FTPTSPERA[E]I | ILKCFLTGFAMKTALLAPDASYM | TTFGKHVVAIHPASVMHGQKREAIM    |
| CpR112  | 121 | FTPTSPERA[E]I | ILKCFLTGFAMKTALLAPDASYM | TTFGKHVVAIHPASVMHGQKREAIM    |
| CnIF6   | 121 | FTPTSPERA[E]I | ILKCFLTGFAMKTALLAPDASYM | TTFGKHVVAIHPASVMHGQKREAIM    |
| CpEP146 | 121 | FTPTSPERA[E]V | ILKCFLTGFAMKTALLAPDASYV | TSFGKHVVAIHPASVMHGQKREAIM    |
| CpBRU17 | 121 | FTPTSPERA[E]V | ILKCFLTGFAMKTALLAPDASYV | TSFGKHVVAIHPASVMHGQKREAIM    |
| Cp09503 | 121 | FTPTSPERA[E]V | ILKCFLTGFAMKTALLAPDASYV | TSFGKHVVAIHPASVMHGQKREAIM    |
| CpJA78  | 121 | FTPTSPERA[E]V | ILKCFLTGFAMKTALLAPDASYV | TSFGKHVVAIHPASVMHGQKREAIM    |
| CpYS522 | 121 | FTPTSPERA[E]V | ILKCFLTGFAMKTALLAPDASYV | TSFGKHVVAIHPASVMHGQKREAIM    |
| Cr09491 | 121 | FTPTSPERA[E]V | ILKCFLAGFAMKTALLAPDASYV | TTFGKHV[AI]HPASVMHGQKREAIM   |
| CrM2269 | 121 | FTPTSPERA[E]V | ILKCFLAGFAMKTALLAPDASYV | TTFGKHVVA[AV]HPASVMHGQKREAIM |
| CrM270  | 121 | FTPTSPERA[E]V | ILKCFLAGFAMKTALLAPDASYV | TTFGKHVVA[AV]HPASVMHGQKREAIM |
| CrGM8A  | 121 | FTPTSPERA[E]V | ILKCFLAGFAMKTALLAPDASYV | TTFGKHVVA[AV]HPASVMHGQKREAIM |
| CnYM2   | 121 | FTPTSPERA[E]V | ILKCFLTGFAMKTALLAPDASYV | TTFGKHVVAIHPASVMHGQKREAIM    |
| CnOB1_6 | 121 | FTPTSPERA[E]V | ILKCFLTGFAMKTALLAPDASYV | TTFGKHVVAIHPASVMHGQKREAIM    |
| CnYM5   | 121 | FTPTSPERA[E]V | ILKCFLTGFAMKTALLAPDASYV | TTFGKHVVAIHPASVMHGQKREAIM    |
| CnES19  | 121 | FTPTSPERA[E]V | ILKCFLTGFAMKTALLAPDASYV | TTFGKHVVAIHPASVMHGQKREAIM    |
| CnIF3   | 121 | FTPTSPERA[E]V | ILKCFLTGFAMKTALLAPDASYV | TTFGKHVVAIHPASVMHGQKREAIM    |

Supplementary Figure S1.C. Amino acid alignment of *pix6*

CpEP155 1 MGKKGAGENSKKAQGOARKADAAASKAAAEDAKKSAAEAAEWEKGAKKGNACKENAEK  
 CpBRU17 1 MGKKGAGENSKKAQGOARKADAAASKAAAEDAKKSAAEAAEWEKGAKKGNACKENAEK  
 Cp09515 1 MGKKGAGENSKKAQGOARKADAAASKAAAEDAKKSAAEAAEWEKGAKKGNACKENAEK  
 CpJA69 1 MGKKGAGENSKKAQGOARKADAAASKAAAEDAKKSAAEAAEWEKGAKKGNACKENAEK  
 CpR112 1 MGKKGAGENSKKAQGOARKADAAASKAAAEDAKKSAAEAAEWEKGAKKGNACKENAEK  
 CnOB1\_6 1 MGKKGAGENSKKAQGOARKADAAASKAAAEDAKKSAAEAAEWEKGAKKGNACKENAEK  
 CnYM2 1 MGKKGAGENSKKAQGOARKADAAASKAAAEDAKKSAAEAAEWEKGAKKGNACKENAEK  
 Cr09491 1 MGKKGAGENSKKAQGOARKADAAASKAAAEDAKKSAAEAAEWEKGAKKGNACKENAEK  
 CrGM8A 1 MGKKGAGENSKKAQGOARKADAAASKAAAEDAKKSAAEAAEWEKGAKKGNACKENAEK  
 CnES19 1 MGKKGAGENSKKAQGOARKADAAASKAAAEDAKKSAAEAAEWEKGAKKGNACKENAEK  
 CnKB1 1 MGKKGAGENSKKAQGOARKADAAASKAAAEDAKKSAAEAAEWEKGAKKGNACKENAEK  
 CpEP146 1 MGKKGAGENSKKAQGOARKADAAASKAAAEDAKKSAAEAAEWEKGAKKGNACKENAEK  
 CpDU74 1 MGKKGAGENSKKAQGOARKADAAASKAAAEDAKKSAAEAAEWEKGAKKGNACKENAEK  
 Cr09503 1 MGKKGAGENSKKAQGOARKADAAASKAAAEDAKKSAAEAAEWEKGAKKGNACKENAEK  
 CpJA12 1 MGKKGAGENSKKAQGOARKADAAASKAAAEDAKKSAAEAAEWEKGAKKGNACKENAEK  
 CpYS522 1 MGKKGAGENSKKAQGOARKADAAASKAAAEDAKKSAAEAAEWEKGAKKGNACKENAEK

CpEP155 61 KAEAARKKAEREALLAEEEEKNTPGRSAPKNAKSAVKKTKGLDQALGOLD--NDAPLPTLN  
 CpBRU17 61 KAEAARKKAEREALLAEEEEKNTPGRSAPKNAKSAVKKTKGLDQALGOLD--NDAPLPTLN  
 Cp09515 61 KAEAARKKAEREALLAEEEEKNTPGRSAPKNAKSAVKKTKGLDQALGOLD--NDAPLPTLN  
 CpJA69 61 KAEAARKKAEREALLAEEEEKNTPGRSAPKNAKSAVKKTKGLDQALGOLD--NDAPLPTLN  
 CpR112 61 KAEAARKKAEREALLAEEEEKNTPGRSAPKNAKSAVKKTKGLDQALGOLD--NDAPLPTLN  
 CnOB1\_6 61 KAEAARKKAEREALLAEEEEKNTPGRSAPKNAKSAVKKTKGLDQALGOLD--NDAPLPTLN  
 CnYM2 61 KAEAARKKAEREALLAEEEEKNTPGRSAPKNAKSAVKKTKGLDQALGOLD--NDAPLPTLN  
 Cr09491 61 KAEAARKKAEREALLAEEEEKNTPGRSAPKNAKSAVKKTKGLDQALGOLDGRD-APLSALN  
 CrGM8A 61 KAEAARKKAEREALLAEEEEKNTPGRSAPKNAKSAVKKTKGLDQALGOLDGRD-APLSALN  
 CnES19 61 KAEAARKKAEREALLAEEEEKNTPGRSAPKNAKSAVKKTKGLDQALGOLDGRD-GPLSALN  
 CnKB1 61 KAEAARKKAEREALLAEEEEKNTPGRSAPKNAKSAVKKTKGLDQALGOLDGRD-GPLSALN  
 CpEP146 61 KAEAARKKAEREALLAEEEEKNTPGRSAPKNAKSAVKKTKGLDQALGOLDGRDQGPLSALN  
 CpDU74 61 KAEAARKKAEREALLAEEEEKNTPGRSAPKNAKSAVKKTKGLDQALGOLDGRDQGPLSALN  
 Cr09503 61 KAEAARKKAEREALLAEEEEKNTPGRSAPKNAKSAVKKTKGLDQALGOLDGRDQGPLSALN  
 CpJA12 61 KAEAARKKAEREALLAEEEEKNTPGRSAPKNAKSAVKKTKGLDQALGOLDGRDQGPLSALN  
 CpYS522 61 KAEAARKKAEREALLAEEEEKNTPGRSAPKNAKSAVKKTKGLDQALGOLDGRDQGPLSALN

CpEP155 119 ASGIENAIDALGLTDSKPSL-KIDRHPERRQWK-YDEWK---LRRLKEMEANDPDWEQKK  
 CpBRU17 119 ASGIENAIDALGLTDSKPSL-KIDRHPERRQWK-YDEWK---LRRLKEMEANDPDWEQKK  
 Cp09515 119 ASGIENAIDALGLTDSKPSL-KIDRHPERRQWK-YDEWK---LRRLKEMEANDPDWEQKK  
 CpJA69 119 ASGIENAIDALGLTDSKPSL-KIDRHPERRQWK-YDEWK---LRRLKEMEANDPDWEQKK  
 CpR112 119 ASGIENAIDALGLTDSKPSL-KIDRHPERRQWK-YDEWK---LRRLKEMEANDPDWEQKK  
 CnOB1\_6 119 ASGIENAIDALGLTDSKPSL-KIDRHPERRQWK-YDEWK---LRRLKEMEANDPDWEQKK  
 CnYM2 119 ASGIENAIDALGLTDSKPSL-KIDRHPERRQWK-YDEWK---LRRLKEMEANDPDWEQKK  
 Cr09491 120 ASGIENAIDALGLTDSSEKVSSEIDKHPERRMGKAYKTWKENNPNREKELQKQGFAYNKRO  
 CrGM8A 120 ASGIENAIDALGLTDSSEKVSSEIDKHPERRMGKAYKTWKENNPNREKELQKQGFAYNKRO  
 CnES19 120 ASGIENAIDALGLTDSMSKVAEVDKHPERRIGKAYKTWKENNPNREKELQKQGFAYNKRO  
 CnKB1 120 ASGIENAIDALGLTDSMSKVAEVDKHPERRIGKAYKTWKENNPNREKELQKQGFAYNKRO  
 CpEP146 121 ASGIEEAIDALGLTDSSEKVTSEIDKHPERRIGKAYKTWKENNPNREKELQKQGFAYNKRO  
 CpDU74 121 ASGIEEAIDALGLTDSSEKVTSEIDKHPERRIGKAYKTWKENNPNREKELQKQGFAYNKRO  
 Cr09503 121 ASGIEEAIDALGLTDSSEKVTSEIDKHPERRIGKAYKTWKENNPNREKELQKQGFAYNKRO  
 CpJA12 121 ASGIEEAIDALGLTDSSEKVTSEIDKHPERRIGKAYKTWKENNPNREKELQKQGFAYNKRO  
 CpYS522 121 ASGIEEAIDALGLTDSSEKVTSEIDKHPERRIGKAYKTWKENNPNREKELQKQGFAYNKRO

CpEP155 174 KYRNALSSESLWKEWKNSPENPTNOVHAAAYNSTOEDIAQITRAQMSKDTEKRLASKX---  
 CpBRU17 174 KYRNALSSESLWKEWKNSPENPTNOVHAAAYNSTOEDIAQITRAQMSKDTEKRLASKX---  
 Cp09515 174 KYRNALSSESLWKEWKNSPENPTNOVHAAAYNSTOEDIAQITRAQMSKDTEKRLASKX---  
 CpJA69 174 KYRNALSSESLWKEWKNSPENPTNOVHAAAYNSTOEDIAQITRAQMSKDTEKRLASKX---  
 CpR112 174 KYRNALSSESLWKEWKNSPENPTNOVHAAAYNSTOEDIAQITRAQMSKDTEKRLASKX---  
 CnOB1\_6 174 KYRNALSDSLWKEWKNSPENPKNQLHAAAYNSTOEDIAQITRAQASQDTEKRLASKX---  
 CnYM2 174 KYRNALSDSLWKEWKNSPENPKNQLHAAAYNSTOEDIAQITRAQASQDTEKRLASKX---  
 Cr09491 180 -----DVLVQEFLESPDNPMKQVSAKYNATREELQAIQAEKRRKVEERLGSKRSAK  
 CrGM8A 180 -----DVLVQEFLESPDNPMKQVSAKYNATREELQAIQAEKRRKVEERLGSKRSAK  
 CnES19 180 -----DVLVQEFLESPDNPMKQVSAKYNATREELQAIQAEKRRKVEERLGSKRGAK  
 CnKB1 180 -----DVLVQEFLESPDNPMKQVSAKYNATREELQAIQAEKRRKVEERLGSKRGAK  
 CpEP146 181 -----DVLVQEFLESPDNPMKQVSAKYNATREELQAIQAEKRRKVEERLGSKRGAK  
 CpDU74 181 -----DVLVQEFLESPDNPMKQVSAKYNATREELQAIQAEKRRKVEERLGSKRGAK  
 Cr09503 181 -----DVLVQEFLESPDNPMKQVSAKYNATREELQAIQAEKRRKVEERLGSKRGAK  
 CpJA12 181 -----DVLVQEFLESPDNPMKQVSAKYNATREELQAIQAEKRRKVEERLGSKRGAK  
 CpYS522 181 -----DVLVQEFLESPDNPMKQVSAKYNATREELQAIQAEKRRKVEERLGSKRGAK

Supplementary Figure S1.D. Amino acid alignment of *vic6*

|           |   |   |   |   |   |   |   |   |   |   |   |   |   |   |   |   |   |   |   |   |   |   |   |   |   |   |   |   |   |   |   |   |   |   |   |   |   |   |   |   |   |   |   |   |   |   |   |   |   |   |   |   |   |   |   |   |   |   |   |   |
|-----------|---|---|---|---|---|---|---|---|---|---|---|---|---|---|---|---|---|---|---|---|---|---|---|---|---|---|---|---|---|---|---|---|---|---|---|---|---|---|---|---|---|---|---|---|---|---|---|---|---|---|---|---|---|---|---|---|---|---|---|---|
| CnOB1.6_1 | 1 | M | T | L | C | Q | T | C | S | I | C | D | T | P | V | G | S | R | T | R | A | S | P | A | Q | H | G | S | T | S | L | K | E | S | V | E | S | R | C | F | I | C | A | R | V | W | E | S | L | S | K | E | Q | K | A | I | A | A | Q | P |
| CnYM2_1_1 | 1 | M | T | L | C | Q | T | C | S | I | C | D | T | P | V | G | S | R | T | R | A | S | P | A | Q | H | G | S | T | S | L | K | E | S | V | E | S | R | C | F | I | C | A | R | V | W | E | S | L | S | K | E | Q | K | A | I | A | A | Q | P |
| Cp09515_1 | 1 | M | T | L | C | Q | I | C | S | I | C | N | T | P | V | G | C | R | K | R | T | S | P | A | Q | H | G | S | T | S | L | K | E | S | V | E | S | Q | C | F | I | C | A | Q | V | W | D | S | L | S | K | E | Q | K | A | I | T | A | Q | P |
| CpEP155_1 | 1 | M | T | L | C | Q | I | C | S | I | C | N | T | P | V | G | C | R | K | R | T | S | P | A | Q | H | G | S | T | S | L | K | E | S | V | E | S | Q | C | F | I | C | A | Q | V | W | D | S | L | S | K | E | Q | K | A | I | T | A | Q | P |
| CpBRU17_1 | 1 | M | T | L | C | Q | I | C | S | I | C | N | T | P | V | G | C | R | K | R | T | S | P | A | Q | H | G | S | T | S | L | K | E | S | V | E | S | Q | C | F | I | C | A | Q | V | W | D | S | L | S | K | E | Q | K | A | I | T | A | Q | P |
| CpR112_1  | 1 | M | T | L | C | Q | I | C | S | I | C | N | T | P | V | G | C | R | K | R | T | S | P | A | Q | H | G | S | T | S | L | K | E | S | V | E | S | Q | C | F | I | C | A | Q | V | W | D | S | L | S | K | E | Q | K | A | I | T | A | Q | P |
| CpJA69_1  | 1 | M | T | L | C | Q | I | C | S | I | C | N | T | P | V | G | C | R | K | R | T | S | P | A | Q | H | G | S | T | S | L | K | E | S | V | E | S | Q | C | F | I | C | A | Q | V | W | D | S | L | S | K | E | Q | K | A | I | T | A | Q | P |
| Cr09491_1 | 1 | M | S | L | C | Q | K | C | Q | S | I | P | D | T | R | I | C | S | G | E | H | R | V | V | Q | H | D | S | V | S | I | Q | K | S | V | E | D | C | C | Y | I | C | A | R | V | N | T | L | S | E | E | Q | K | A | V | S | K | R | P |   |
| CrGM8A_1  | 1 | M | S | L | C | Q | K | C | Q | S | I | P | D | T | R | I | C | S | G | E | H | R | V | V | Q | H | D | S | V | S | I | Q | K | S | V | E | D | C | C | Y | I | C | A | R | V | N | T | L | S | E | E | Q | K | A | V | S | K | R | P |   |
| CnES19_1  | 1 | M | S | L | C | Q | K | C | Q | S | I | P | D | T | R | I | C | S | G | E | H | R | V | V | L | R | H | D | S | A | S | I | Q | K | S | V | G | D | G | C | Y | I | C | A | R | V | N | S | L | S | E | E | Q | K | A | V | C | K | R | P |
| CnKB1_1   | 1 | M | S | L | C | Q | K | C | Q | S | I | P | D | T | R | I | C | S | G | E | H | R | V | V | L | R | H | D | S | A | S | I | Q | K | S | V | G | D | G | C | Y | I | C | A | R | V | N | S | L | S | E | E | Q | K | A | V | C | K | R | P |
| CpEP146_1 | 1 | M | S | L | C | R | K | C | Q | A | I | P | D | T | R | I | C | S | G | E | H | R | V | V | R | H | D | S | A | S | I | Q | K | S | V | E | D | R | C | Y | I | C | A | R | V | N | S | L | S | E | E | Q | K | A | V | C | K | R | P |   |
| CpDU74_1  | 1 | M | S | L | C | R | K | C | Q | A | I | P | D | T | R | I | C | S | G | E | H | R | V | V | R | H | D | S | A | S | I | Q | K | S | V | E | D | R | C | Y | I | C | A | R | V | N | S | L | S | E | E | Q | K | A | V | C | K | R | P |   |
| Cp09503_1 | 1 | M | S | L | C | R | K | C | Q | A | I | P | D | T | R | I | C | S | G | E | H | R | V | V | R | H | D | S | A | S | I | Q | K | S | V | E | D | R | C | Y | I | C | A | R | V | N | S | L | S | E | E | Q | K | A | V | C | K | R | P |   |
| CpJA12_1  | 1 | M | S | L | C | R | K | C | Q | A | I | P | D | T | R | I | C | S | G | E | H | R | V | V | R | H | D | S | A | S | I | Q | K | S | V | E | D | R | C | Y | I | C | A | R | V | N | S | L | S | E | E | Q | K | A | V | C | K | R | P |   |
| CpYS522_1 | 1 | M | S | L | C | R | K | C | Q | A | I | P | D | T | R | I | C | S | G | E | H | R | V | V | R | H | D | S | A | S | I | Q | K | S | V | E | D | R | C | Y | I | C | A | R | V | N | S | L | S | E | E | Q | K | A | V | C | K | R | P |   |

|           |    |   |   |   |   |   |   |   |   |   |   |   |   |   |   |   |   |   |   |   |    |    |   |   |   |   |   |   |   |   |   |   |   |   |    |    |   |   |   |   |   |   |   |   |   |   |   |   |   |   |   |   |   |   |   |   |   |   |   |
|-----------|----|---|---|---|---|---|---|---|---|---|---|---|---|---|---|---|---|---|---|---|----|----|---|---|---|---|---|---|---|---|---|---|---|---|----|----|---|---|---|---|---|---|---|---|---|---|---|---|---|---|---|---|---|---|---|---|---|---|---|
| CnOB1.6_1 | 61 | A | F | M | G | I | R | Y | E | I | L | R | R | D | S | V | A | E | L | G | -- | D  | N | A | V | M | A | G | L | M | F | E | P | G | -- | D  | D | L | Y | D | C | E | D | Y | K | V | V | G | G | W | R | E | Q | T | D | O | F | S |   |
| CnYM2_1_1 | 61 | A | F | M | G | I | R | Y | E | I | L | R | R | D | S | V | A | E | L | G | -- | D  | N | A | V | M | A | G | L | M | F | E | P | G | -- | D  | D | L | Y | D | C | E | D | Y | K | V | V | G | G | W | R | E | Q | T | D | O | F | S |   |
| Cp09515_1 | 61 | T | F | M | G | I | Q | Y | E | I | T | L | K | R | D | S | V | A | E | L | G  | -- | D | N | A | V | M | A | G | L | M | C | E | P | G  | -- | D | D | L | Y | E | C | E | D | Y | K | V | V | G | G | W | R | G | E | T | G | O | F | S |
| CpEP155_1 | 61 | T | F | M | G | I | Q | Y | E | I | T | L | K | R | D | S | V | A | E | L | G  | -- | D | N | A | V | M | A | G | L | M | C | E | P | G  | -- | D | D | L | Y | E | C | E | D | Y | K | V | V | G | G | W | R | G | E | T | G | O | F | S |
| CpBRU17_1 | 61 | T | F | M | G | I | Q | Y | E | I | T | L | K | R | D | S | V | A | E | L | G  | -- | D | N | A | V | M | A | G | L | M | C | E | P | G  | -- | D | D | L | Y | E | C | E | D | Y | K | V | V | G | G | W | R | G | E | T | G | O | F | S |
| CpR112_1  | 61 | T | F | M | G | I | Q | Y | E | I | T | L | K | R | D | S | V | A | E | L | G  | -- | D | N | A | V | M | A | G | L | M | C | E | P | G  | -- | D | D | L | Y | E | C | E | D | Y | K | V | V | G | G | W | R | G | E | T | G | O | F | S |
| CpJA69_1  | 61 | T | F | M | G | I | Q | Y | E | I | T | L | K | R | D | S | V | A | E | L | G  | -- | D | N | A | V | M | A | G | L | M | C | E | P | G  | -- | D | D | L | Y | E | C | E | D | Y | K | V | V | G | G | W | R | G | E | T | G | O | F | S |
| Cr09491_1 | 61 | T | F | E | G | I | V | Y | K | M | Y | M | R | D | H | S | Y | G | G | P | D  | -- | H | P | I | L | A | Q | L | L | C | O | P | A | K  | D  | D | L | Y | D | C | E | D | Y | N | E | V | G | G | W | R | N | E | A | G | A | F | A |   |
| CrGM8A_1  | 61 | T | F | E | G | I | V | Y | K | M | Y | M | R | D | H | S | Y | G | G | P | D  | -- | H | P | I | L | A | Q | L | L | C | O | P | A | K  | D  | D | L | Y | D | C | E | D | Y | N | E | V | G | G | W | R | N | E | A | G | A | F | A |   |
| CnES19_1  | 61 | T | F | E | G | I | V | Y | K | M | Y | T | R | D | H | S | H | R | G | P | N  | -- | A | R | P | I | S | A | Q | L | L | C | O | P | A  | K  | D | D | L | Y | D | C | E | D | Y | N | E | V | G | G | W | R | S | E | A | G | A | F | A |
| CnKB1_1   | 61 | T | F | E | G | I | V | Y | K | M | Y | T | R | D | H | S | H | R | G | P | N  | -- | A | R | P | I | S | A | Q | L | L | C | O | P | A  | K  | D | D | L | Y | D | C | E | D | Y | N | E | V | G | G | W | R | S | E | A | G | A | F | A |
| CpEP146_1 | 61 | T | F | E | G | I | V | Y | K | M | Y | T | R | D | S | Y | G | G | S | N | A  | H  | S | R | P | I | L | A | Q | L | L | C | O | P | A  | K  | D | D | L | Y | D | C | D | D | Y | N | E | V | G | G | W | R | N | E | A | G | A | F | A |
| CpDU74_1  | 61 | T | F | E | G | I | V | Y | K | M | Y | T | R | D | S | Y | G | G | S | N | A  | H  | S | R | P | I | L | A | Q | L | L | C | O | P | A  | K  | D | D | L | Y | D | C | D | D | Y | N | E | V | G | G | W | R | N | E | A | G | A | F | A |
| Cp09503_1 | 61 | T | F | E | G | I | V | Y | K | M | Y | T | R | D | S | Y | G | G | S | N | A  | H  | S | R | P | I | L | A | Q | L | L | C | O | P | A  | K  | D | D | L | Y | D | C | D | D | Y | N | E | V | G | G | W | R | N | E | A | G | A | F | A |
| CpJA12_1  | 61 | T | F | E | G | I | V | Y | K | M | Y | T | R | D | S | Y | G | G | S | N | A  | H  | S | R | P | I | L | A | Q | L | L | C | O | P | A  | K  | D | D | L | Y | D | C | D | D | Y | N | E | V | G | G | W | R | N | E | A | G | A | F | A |
| CpYS522_1 | 61 | T | F | E | G | I | V | Y | K | M | Y | T | R | D | S | Y | G | G | S | N | A  | H  | S | R | P | I | L | A | Q | L | L | C | O | P | A  | K  | D | D | L | Y | D | C | D | D | Y | N | E | V | G | G | W | R | N | E | A | G | A | F | A |

|           |     |   |   |   |   |   |   |   |   |   |   |   |   |   |   |   |   |   |   |   |   |   |   |   |   |   |   |   |   |   |   |   |   |   |   |   |   |   |   |   |   |   |   |   |   |   |   |   |   |   |   |   |   |   |   |   |   |   |   |
|-----------|-----|---|---|---|---|---|---|---|---|---|---|---|---|---|---|---|---|---|---|---|---|---|---|---|---|---|---|---|---|---|---|---|---|---|---|---|---|---|---|---|---|---|---|---|---|---|---|---|---|---|---|---|---|---|---|---|---|---|---|
| CnOB1.6_1 | 118 | L | N | P | A | K | F | P | V | D | E | V | D | L | P | E | T | T | N | H | P | S | C | W | R | T | V | A | K | W | V | E | N | C | G | S | N | H | R | T | C | R | E | L | H | O | P | G | W | L | P | K | R | L | V | D | L | E | N |
| CnYM2_1_1 | 118 | L | N | P | A | K | F | P | V | D | E | V | D | L | P | E | T | T | N | H | P | S | C | W | R | T | V | A | K | W | V | E | N | C | G | S | N | H | R | T | C | R | E | L | H | O | P | G | W | L | P | K | R | L | V | D | L | E | N |
| Cp09515_1 | 118 | L | N | P | A | K | F | P | V | D | K | V | D | L | P | E | T | T | N | H | P | S | C | W | N | T | V | A | K | W | V | E | N | C | R | S | N | H | K | T | C | R | D | L | H | O | T | G | W | L | P | K | R | L | V | D | L | E | N |
| CpEP155_1 | 118 | L | N | P | A | K | F | P | V | D | K | V | D | L | P | E | T | T | N | H | P | S | C | W | N | T | V | A | K | W | V | E | N | C | R | S | N | H | K | T | C | R | D | L | H | O | T | G | W | L | P | K | R | L | V | D | L | E | N |
| CpBRU17_1 | 118 | L | N | P | A | K | F | P | V | D | K | V | D | L | P | E | T | T | N | H | P | S | C | W | N | T | V | A | K | W | V | E | N | C | R | S | N | H | K | T | C | R | D | L | H | O | T | G | W | L | P | K | R | L | V | D | L | E | N |
| CpR112_1  | 118 | L | N | P | A | K | F | P | V | D | K | V | D | L | P | E | T | T | N | H | P | S | C | W | N | T | V | A | K | W | V | E | N | C | R | S | N | H | K | T | C | R | D | L | H | O | T | G | W | L | P | K | R | L | V | D | L | E | N |
| CpJA69_1  | 118 | L | N | P | A | K | F | P | V | D | K | V |   |   |   |   |   |   |   |   |   |   |   |   |   |   |   |   |   |   |   |   |   |   |   |   |   |   |   |   |   |   |   |   |   |   |   |   |   |   |   |   |   |   |   |   |   |   |   |

CnOB1.6\_1 238 AILATGKLGFRYIWIDSLCI IQGSRD DWMQQAPLMNKVYRNAS LTLCCATASPDAHGGFFC  
CnYM2\_1 238 AILATGKLGFRYIWIDSLCI IQGSRD DWMQQAPLMNKVYRNAS LTLCCATASPDAHGGFFC  
Cp09515\_1 238 ALFATGKLGFRYIWIDSLCI IQGSRD DWMQQAPLMNKVYRNAS LTLCCATASPDAHGGFFC  
CpEP155\_1 238 ALFATGKLGFRYIWIDSLCI IQGSRD DWMQQAPLMNKVYRNAS LTLCCATASPDAHGGFFC  
CpBRU17\_1 238 ALFATGKLGFRYIWIDSLCI IQGSRD DWMQQAPLMNKVYRNAS LTLCCATASPDAHGGFFC  
CpR112\_1 238 ALFATGKLGFRYIWIDSLCI IQGSRD DWMQQAPLMNKVYRNAS LTLCCATASPDAHGGFFC  
CpJA69\_1 238 ALFATGKLGFRYIWIDSLCI IQGSRD DWMQQAPLMNKVYRNAS LTLCCATASPDAHGGFFC  
Cr09491\_1 239 AIFTTHRLGYRYIWIDSLCI IQGSRK DWAEQAPLMNKVYKNAAL TLGAVASAEAEAGGFFR  
CrGM8A\_1 239 AIFTTHRLGYRYIWIDSLCI IQGSRK DWAEQAPLMNKVYKNAAL TLGAVASAEAEAGGFFR  
CnES19\_1 239 AIFTTHRLGYRYIWIDSLCI MQGSRK DWAEQAPLMNKVYKNAAL TLGAVASAEAEAGGFFR  
CnKB1\_1 239 AIFTTHRLGYRYIWIDSLCI MQGSRK DWAEQAPLMNKVYKNAAL TLGAVASAEAEAGGFFR  
CpEP146\_1 241 AIFTTHRLGYRYIWIDSLCI MQGSRK DWAEQAPLMNKVYKNAAL TLGAVASAEAEAGGFFR  
CpDU74\_1 241 AIFTTHRLGYRYIWIDSLCI MQGSRK DWAEQAPLMNKVYKNAAL TLGAVASAEAEAGGFFR  
Cp09503\_1 241 AIFTTHRLGYRYIWIDSLCI MQGSRK DWAEQAPLMNKVYKNAAL TLGAVASAEAEAGGFFR  
CpJA12\_1 241 AIFTTHRLGYRYIWIDSLCI MQGSRK DWAEQAPLMNKVYKNAAL TLGAVASAEAEAGGFFR  
CpYS522\_1 241 AIFTTHRLGYRYIWIDSLCI MQGSRK DWAEQAPLMNKVYKNAAL TLGAVASAEAEAGGFFR

CnOB1.6\_1 298 DRDPALVRPHPF TLRTEAEGLVEGL LIKSDFWETD VRRAPLNQ RAWVVQERLLAPRSLCF  
CnYM2\_1 298 DRDPALVRPHPF TLRTEAEGLVEGL LIKSDFWETD VRRAPLNQ RAWVVQERLLAPRSLCF  
Cp09515\_1 298 NREPFAVRPHPF TLRTEAEGLVEGL LIKSDFWETD IRRAPLNQ RAWVVQERLLAPRSLCF  
CpEP155\_1 298 NREPFAVRPHPF TLRTEAEGLVEGL LIKSDFWETD IRRAPLNQ RAWVVQERLLAPRSLCF  
CpBRU17\_1 298 NREPFAVRPHPF TLRTEAEGLVEGL LIKSDFWETD IRRAPLNQ RAWVVQERLLAPRSLCF  
CpR112\_1 298 NREPFAVRPHPF TLRTEAEGLVEGL LIKSDFWETD IRRAPLNQ RAWVVQERLLAPRSLCF  
CpJA69\_1 298 NREPFAVRPHPF TLRTEAEGLVEGL LIKSDFWETD IRRAPLNQ RAWVVQERLLAPRSLCF  
Cr09491\_1 299 SRDPDKVRPCPF RVNTE NAGVLDCLVVKSDFWETEVLHAPLSKRAWVVQERLLAPRSLYF  
CrGM8A\_1 299 SRDPDKVRPCPF RVNTE NAGVLDCLVVKSDFWETEVLHAPLSKRAWVVQERLLAPRSLYF  
CnES19\_1 299 SRDPDKTRPCPF RVNTE NAGVLDCLVVKSDFWETEVLHAPLSKRAWVVQERLLAPRSLYF  
CnKB1\_1 299 SRDPDKTRPCPF RVNTE NAGVLDCLVVKSDFWETEVLHAPLSKRAWVVQERLLAPRSLYF  
CpEP146\_1 301 SRDPDKTRPCPF RVNTE SEGILDCLVVKSDFWETEVLHAPLSKRAWVVQERLLAPRSLYF  
CpDU74\_1 301 SRDPDKTRPCPF RVNTE SEGILDCLVVKSDFWETEVLHAPLSKRAWVVQERLLAPRSLYF  
Cp09503\_1 301 SRDPDKTRPCPF RVNTE SEGILDCLVVKSDFWETEVLHAPLSKRAWVVQERLLAPRSLYF  
CpJA12\_1 301 SRDPDKTRPCPF RVNTE SEGILDCLVVKSDFWETEVLHAPLSKRAWVVQERLLAPRSLYF  
CpYS522\_1 301 SRDPDKTRPCPF RVNTE SEGILDCLVVKSDFWKTEVLHAPLSKRAWVVQERLLAPRSLYF

CnOB1.6\_1 358 GQNQLFWECQELQACEVFPNGIPKEFISDIQHPDTIDAVS IKAFRRTISWLADPTIDKTY  
CnYM2\_1 358 GQNQLFWECQELQACEVFPNGIPKEFISDIQHPDTIDAVS IKAFRRTISWLADPTIDKTY  
Cp09515\_1 358 GQNQLFWECQELQACEVFPNGIPKEFISDIQHPDTIDAVS IKAFRRTISWLADPTIDKTY  
CpEP155\_1 358 GQNQLFWECQELQACEVFPNGIPKEFISDIQHPDTIDAVS IKAFRRTISWLADPTIDKTY  
CpBRU17\_1 358 GQNQLFWECQELQACEVFPNGIPKEFISDIQHPDTIDAVS IKAFRRTISWLADPTIDKTY  
CpR112\_1 358 GQNQLFWECQELQACEVFPNGIPKEFISDIQHPDTIDAVS IKAFRRTISWLADPTIDKTY  
CpJA69\_1 358 GQNQLFWECQELQACEVFPNGIPKEFISDIQHPDTIDAVS IKAFRRTISWLADPTIDKTY  
Cr09491\_1 359 GQSOLYWECEAFACEVFPDGVPLAFVSEIAD IEAIDVVPVKAFLRTARSLVSP TADQ-D  
CrGM8A\_1 359 GQSOLYWECEAFACEVFPDGVPLAFVSEIAD IEAIDVVPVKAFLRTARSLVSP TADQ-D  
CnES19\_1 359 GQSOLYWECEAFACEVFPDGVPLAFVSEIAD IEAIDVVPVKAFLRTARSLVSP TADQ-D  
CnKB1\_1 359 GQSOLYWECEAFACEVFPDGVPLAFVSEIAD IEAIDVVPVKAFLRTARSLVSP TADQ-D  
CpEP146\_1 361 GQSOLYWECEAFACEVFPDGVPLAFVSEIAD IEAVDVPVKAFLRTAGALVNPTTDQED  
CpDU74\_1 361 GQSOLYWECEAFACEVFPDGVPLAFVSEIAD IEAVDVPVKAFLRTAGALVNPTTDQED  
Cp09503\_1 361 GQSOLYWECEAFACEVFPDGVPLAFVSEIAD IEAVDVPVKAFLRTAGALVNPTTDQED  
CpJA12\_1 361 GQSOLYWECEAFACEVFPDGVPLAFVSEIAD IEAVDVPVKAFLRTAGALVNPTTDQED  
CpYS522\_1 361 GQSOLYWECEAFACEVFPDGVPLAFVSEIAD IEAVDVPVKAFLRTAGALVNPTTDQED

CnOB1.6\_1 418 AD-PALDNMRWYD SPYQVWDEILQLYASCALTRGDDKLVAISGIAKDLAAYLDDEYLAGL  
CnYM2\_1 418 AD-PALDNMRWYD SPYQVWDEILQLYASCALTRGDDKLVAISGIAKDLAAYLDDEYLAGL  
Cp09515\_1 418 AD-PELDTMRWYD SPYQVWDEILQLYSSCALTQGGDKLVAISGIAKDLAVYLDDEYLAGL  
CpEP155\_1 418 AD-PELDTMRWYD SPYQVWDEILQLYSSCALTQGGDKLVAISGIAKDLAVYLDDEYLAGL  
CpBRU17\_1 418 AD-PELDTMRWYD SPYQVWDEILQLYSSCALTQGGDKLVAISGIAKDLAVYLDDEYLAGL  
CpR112\_1 418 AD-PELDTMRWYD SPYQVWDEILQLYSSCALTQGGDKLVAISGIAKDLAVYLDDEYLAGL  
CpJA69\_1 418 AD-PELDTMRWYD SPYQVWDEILQLYSSCALTQGGDKLVAISGIAKDLAVYLDDEYLAGL  
Cr09491\_1 418 EEIHETDVERFYESP YQVWNEILHTYVRCGLTKPEDKFVAISGVVKDFADVVGDEYLAGL  
CrGM8A\_1 418 EEIHETDVERFYESP YQVWNEILHTYVRCGLTKPEDKFVAISGVVKDFADVVGDEYLAGL  
CnES19\_1 418 AEIRETDVERFYESP YQVWNEILHLYVRCGLTKPEDKFVAISGVVKDFAEAVGDEYLAGL  
CnKB1\_1 418 AEIRETDVERFYESP YQVWNEILHLYVRCGLTKPEDKFVAISGVVKDFAEAVGDEYLAGL  
CpEP146\_1 421 AKLHETDLD R FYESP YQVWNEILHSYVRCGLTKPEDKFVAISGVVKDFADVVGDEYLAGL  
CpDU74\_1 421 AKLHETDLD R FYESP YQVWNEILHSYVRCGLTKPEDKFVAISGVVKDFADVVGDEYLAGL  
Cp09503\_1 421 AKLHETDLD R FYESP YQVWNEILHSYVRCGLTKPEDKFVAISGVVKDFADVVGDEYLAGL  
CpJA12\_1 421 AKLHETDLD R FYESP YQVWNEILHSYVRCGLTKPEDKFVAISGVVKDFADVVGDEYLAGL  
CpYS522\_1 421 AKLHETDLD R FYESP YQVWNEILHSYVRCGLTKPEDKFVAISGVVKDFADVVGDEYLAGL

CnOB1.6\_1 477 WRAKLVDGLLWRVERDEMTGAYIPASRPKRYRAPTSWAAVDTIRIRARTSV-FGEVHDG  
CnYM2\_1 477 WRAKLVDGLLWRVERDEMTGAYIPASRPKRYRAPTSWAAVDTIRIRARTSV-FGEVHDG  
Cp09515\_1 477 WRAKLVDGLLWRVERDEMTGAYIPAKRPQRYRAPTSWASVDAIRTRAHTAV-FGEVHDG  
CpEP155\_1 477 WRAKLVDGLLWRVERDEMTGAYIPAKRPQRYRAPTSWASVDAIRTRAHTAV-FGEVHDG  
CpBRU17\_1 477 WRAKLVDGLLWRVERDEMTGAYIPAKRPQRYRAPTSWASVDAIRTRAHTAV-FGEVHDG  
CpR112\_1 477 WRAKLVDGLLWRVERDEMTGAYIPAKRPQRYRAPTSWASVDAIRTRAHTAV-FGEVHDG  
CpJA69\_1 477 WRAKLVDGLLWRVERDEMTGAYIPAKRPQRYRAPTSWASVDAIRTRAHTAV-FGEVHDG  
Cr09491\_1 478 WRKNLIDGLLWHVQEEELTGLYTPATRVPEYRAPSWSWASVDSPHVRVQSPAHLTYDSSG  
CrGM8A\_1 478 WRKNLIDGLLWHVQEEELTGLYTPATRVPEYRAPSWSWASVDSPHVRVQSPAHLTYDSSG  
CnES19\_1 478 WRKNLIDGLLWHVQEEELTGLYTPATRVPEYRAPSWSWASVDSPHVRVQSPAHLTYDSSG  
CnKB1\_1 478 WRKNLIDGLLWHVQEEELTGLYTPATRVPEYRAPSWSWASVDSPHVRVQSPAHLTYDSSG  
CpEP146\_1 481 WRKNLIDGLLWHVQEEELTGLYTPATRVPEYRAPSWSWASVDSPHVRVQSPAHLTYDSSG  
CpDU74\_1 481 WRKNLIDGLLWHVQEEELTGLYTPATRVPEYRAPSWSWASVDSPHVRVQSPAHLTYDSSG  
Cp09503\_1 481 WRKNLIDGLLWHVQEEELTGLYTPATRVPEYRAPSWSWASVDSPHVRVQSPAHLTYDSSG  
CpJA12\_1 481 WRKNLIDGLLWHVQEEELTGLYTPATRVPEYRAPSWSWASVDSPHVRVQSPAHLTYDSSG  
CpYS522\_1 481 WRKNLIDGLLWHVQEEELTGLYTPATRVPEYRAPSWSWASVDSPHVRVQSPAHLTYDSSG

CnOB1.6\_1 536 YTEFVDVNVVVKGS-----DPTGELDHACLHARGHLVTRRRKPVGPRIA  
CnYM2\_1 536 YTEFVDVNVVVKGS-----DPTGELDHACLHARGHLVTRRRKPVGPRIA  
Cp09515\_1 536 YTELVDVHVVPKGS-----DPTGELDHACLLARGHLVTRRRKPVDPRTA  
CpEP155\_1 536 YTELVDVHVVPKGS-----DPTGELDHACLLARGHLVTRRRKPVDPRTA  
CpBRU17\_1 536 YTELVDVHVVPKGS-----DPTGELDHACLLARGHLVTRRRKPVDPRTA  
CpR112\_1 536 YTELVDVHVVPKGS-----DPTGELDHACLLARGHLVTRRRKPVDPRTA  
CpJA69\_1 536 YTELVDVHVVPKGS-----DPTGELDHACLLARGHLVTRRRKPVDPRTA  
Cr09491\_1 538 YAAIDEVNLVPRNE-----DOEGGS GAPGPPAGELSHACL RARGYLIRTRRPPVDRNA  
CrGM8A\_1 538 YAAIDEVNLVPRNE-----DOEGGS GAPGPPAGELSHACL RARGYLIRTRRPPVDRNA  
CnES19\_1 538 YAAIDEVTLVPRDE-----EEDGGGG GAPGPPAGELSHACL RARGHLIRTRRPPVDRNA  
CnKB1\_1 538 YAAIDEVTLVPRDE-----EEDGGGG GAPGPPAGELSHACL RARGHLIRTRRPPVDRNA  
CpEP146\_1 541 YAAIDEVNLVPRNEEEKEEEEEGGGG GAPGPPAGELSHACL RARGYLIRTRRPPVDRNA  
CpDU74\_1 541 YAAIDEVNLVPRNEEEKEEEEEGGGG GAPGPPAGELSHACL RARGYLIRTRRPPVDRNA  
Cp09503\_1 541 YAAIDEVNLVPRNEEEKEEEEEGGGG GAPGPPAGELSHACL RARGYLIRTRRPPVDRNA  
CpJA12\_1 541 YAAIDEVNLVPRNEEEKEEEEEGGGG GAPGPPAGELSHACL RARGYLIRTRRPPVDRNA  
CpYS522\_1 541 YAAIDEVNLVPRNEEEKEEEEEGGGG GAPGPPAGELSHACL RARGYLIRTRRPPVDRNA

CnOB1.6\_1 580 HPGLFGTFYPDNYDEVTGDEFYCLPLREDLGVNV---PSLTGLVLPVFPREGTIVTGGAA--  
CnYM2\_1 580 HPGLFGTFYPDNYDEVTGDEFYCLPLREDLGVNV---PSLTGLVLPVFPREGTIVTGGAA--  
Cp09515\_1 580 RHDLFGTFYPDSYDEVTGDEFYCLPLREDLCAKL---PSLTGLVLMPPFRDSTVTGEAA--  
CpEP155\_1 580 RHDLFGTFYPDSYDEVTGDEFYCLPLREDLCAKL---PSLTGLVLMPPFRDSTVTGEAA--  
CpBRU17\_1 580 RHDLFGTFYPDSYDEVTGDEFYCLPLREDLCAKL---PSLTGLVLMPPFRDSTVTGEAA--  
CpR112\_1 580 RHDLFGTFYPDSYDEVTGDEFYCLPLREDLCAKL---PSLTGLVLMPPFRDSTVTGEAA--  
CpJA69\_1 580 RHDLFGTFYPDSYDEVTGDEFYCLPLREDLCAKL---PSLTGLVLMPPFRDSTVTGEAA--  
Cr09491\_1 592 -LGSFGQFYPTD-EGLEGDVFFCWPLRERINDGDVSGNYLMGLVLGTHPEAAGEEAE--  
CrGM8A\_1 592 -LGSFGQFYPTD-EGLEGDVFFCWPLRERINDGDVSGNYLMGLVLGTHPEAAGEEAE--  
CnES19\_1 593 -LGSFGQFYPTD-EALEGNAFFCWPLRERINDGDVSGNYLMGLVLGTYHEAAGEEAAEK  
CnKB1\_1 593 -LGSFGQFYPTD-EALEGNAFFCWPLRERINDGDVSGNYLMGLVLGTYHEAAGEEAAEK  
CpEP146\_1 601 -LGSFGQFYPTD-EALEGDVFFCWPLRERINDGDVSGNYLMGLVLGTHPEAAGEEAE--  
CpDU74\_1 601 -LGSFGQFYPTD-EALEGDVFFCWPLRERINDGDVSGNYLMGLVLGTHPEAAGEEAE--  
Cp09503\_1 601 -LGSFGQFYPTD-EALEGDVFFCWPLRERINDGDVSGNYLMGLVLGTHPEAAGEEAE--  
CpJA12\_1 601 -LGSFGQFYPTD-EALEGDVFFCWPLRERINDGDVSGNYLMGLVLGTHPEAAGEEAE--  
CpYS522\_1 601 -LGSFGQFYPTD-EALEGDVFFCWPLRERINDGDVSGNYLMGLVLGTHPEAAGEEAE--

CnOB1.6\_1 635 -----AHGAATSSCCSRCAGKMLLVRIIGTFDIAGKDPLOALGLVQPDNWAEWGPEGVHL  
CnYM2\_1 635 -----AHGAATSSCCSRCAGKMLLVRIIGTFDIAGKDPLOALGLVQPDNWAEWGPEGVHL  
Cp09515\_1 635 -----AOGAATS-SCSRCAGKMLLVRIIGTFEIAKGDPLQALGLVKPDNWAECGPEGVHL  
CpEP155\_1 635 -----AOGAATS-SCSRCAGKMLLVRIIGTFEIAKGDPLQALGLVKPDNWAECGPEGVHL  
CpBRU17\_1 635 -----AOGAATS-SCSRCAGKMLLVRIIGTFEIAKGDPLQALGLVKPDNWAECGPEGVHL  
CpR112\_1 635 -----AOGAATS-SCSRCAGKMLLVRIIGTFEIAKGDPLQALGLVKPDNWAECGPEGVHL  
CpJA69\_1 635 -----AOGAATS-SCSRCAGKMLLVRIIGTFEIAKGDPLQALGLVKPDNWAECGPEGVHL  
Cr09491\_1 650 DE-KDGRARRKR TSCDMCAGRRVFTRVGTFEIDHGDPLQYLSMKKPGDWADWGEKDH  
CrGM8A\_1 650 DE-KDGRARRKR TSCDMCAGRRVFTRVGTFEIDHGDPLQYLSMKKPGDWADWGEKDH  
CnES19\_1 651 GEEDDGAAKRW TSCDRCSGRRVFTRVGTFEIDHGDPLQYLSMKKPGDWADWGEKDH  
CnKB1\_1 651 GEEDDGAAKRW TSCDRCSGRRVFTRVGTFEIDHGDPLQYLSMKKPGDWADWGEKDH  
CpEP146\_1 656 GEQDADAATNRKR TSCDRCSGORVFTRVGTFEIDHGDPLQYLSMKKPGDWADWGEKDH  
CpDU74\_1 656 GEQDADAATNRKR TSCDRCSGORVFTRVGTFEIDHGDPLQYLSMKKPGDWADWGEKDH  
Cp09503\_1 656 GEQDADAATNRKR TSCDRCSGORVFTRVGTFEIDHGDPLQYLSMKKPGDWADWGEKDH  
CpJA12\_1 656 GEQDADAATNRKR TSCDRCSGORVFTRVGTFEIDHGDPLQYLSMKKPGDWADWGEKDH  
CpYS522\_1 656 GEQDADAATNRKR TSCDRCSGORVFTRVGTFEIDHGDPLQYLSMKKPGDWADWGEKDH



|           |     |                 |
|-----------|-----|-----------------|
| CnOB1.6_1 | 689 | WFLPDHPVSEFVIL* |
| CnYM2_1   | 689 | WFLPDHPVSEFVIL* |
| Cp09515_1 | 688 | WFLPDHPVSEFVIL* |
| CpEP155_1 | 688 | WFLPDHPVSEFVIL* |
| CpBRU17_1 | 688 | WFLPDHPVSEFVIL* |
| CpR112_1  | 688 | WFLPDHPVSEFVIL* |
| CpJA69_1  | 688 | WFLPDHPVSEFVIL* |
| Cr09491_1 | 709 | WFPEDAQPYEFFVV* |
| CrGM8A_1  | 709 | WFPEDAQPYEFFVV* |
| CnES19_1  | 711 | WFPEDAQPYEFLVV* |
| CnKB1_1   | 711 | WFPEDAQPYEFLVV* |
| CpEP146_1 | 716 | WFPEDAQPYEFIVV* |
| CpDU74_1  | 716 | WFPEDAQPYEFIVV* |
| Cp09503_1 | 716 | WFPEDAQPYEFIVV* |
| CpJA12_1  | 716 | WFPEDAQPYEFIVV* |
| CpYS522_1 | 716 | WFPEDAQPYEFIVV* |
